# Supplementary material
Source: PubMed Central journal article supplement (PMC4288120)
Supplement: supp_kwu255_kwu255supp.pdf [file supp_kwu255_kwu255supp.pdf]

## **WEB MATERIAL**

### **Trends in Diabetes Incidence Among 7 Million Insured Adults, 2006–2011: The SUPREME-DM Project**

Gregory A. Nichols\*, Emily B. Schroeder, Andrew J. Karter, Edward W. Gregg, Jay Desai, Jean M. Lawrence, Patrick J. O'Connor, Stanley Xu, Katherine M. Newton, Marsha A. Raebel, Ram D. Pathak, Beth Waitzfelder, Jodi Segal, Jennifer Elston Lafata, Melissa G. Butler, H. Lester Kirchner, Abraham Thomas, and John F. Steiner for the SUPREME-DM Study Group

\*Correspondence to Dr. Gregory A. Nichols, Kaiser Permanente Center for Health Research, 3800 North Interstate Avenue, Portland, OR 97227 (e-mail: [greg.nichols@kpchr.org](mailto:greg.nichols@kpchr.org)).

Abbreviations: CI, confidence interval; FPG, fasting plasma glucose; A1C, hemoglobin A<sub>1c</sub>; SUPREME-DM, Surveillance, Prevention, and Management of Diabetes Mellitus.

**Web Figure 1.** Crude Diabetes Incidence per 1,000 Adults, by Sex (A), Age Group (B), Race/Ethnicity (C), and Body Mass Index (D): SUPREME-DM Project, 2006–2011

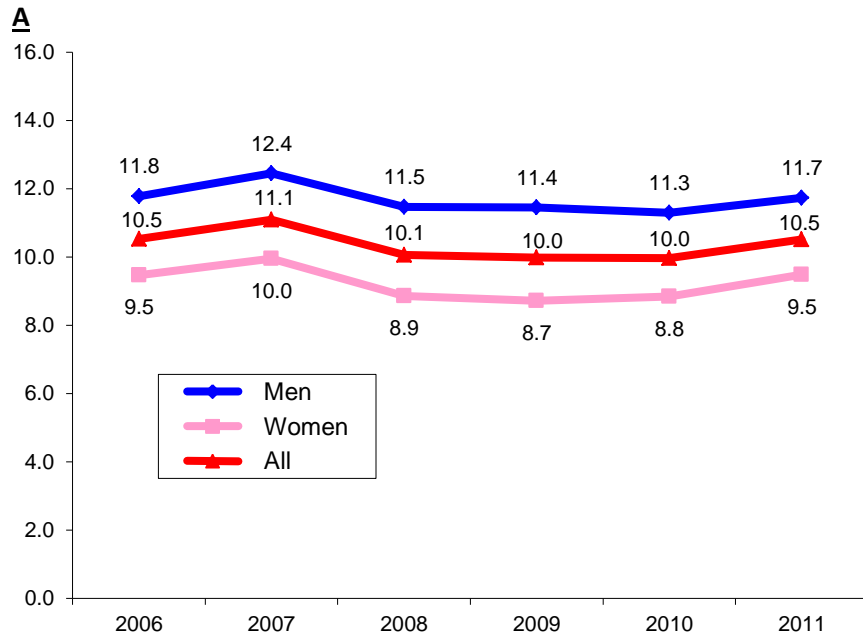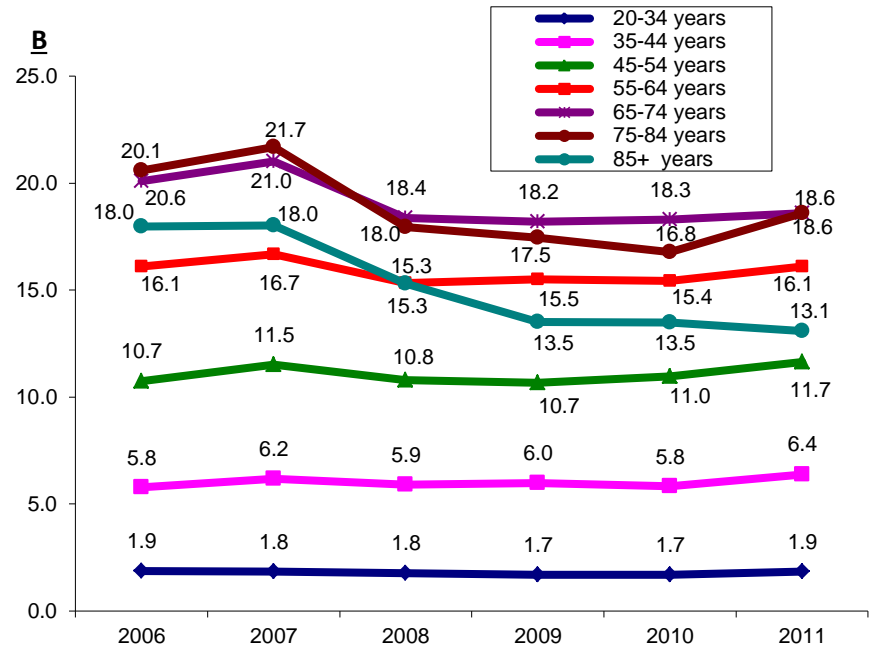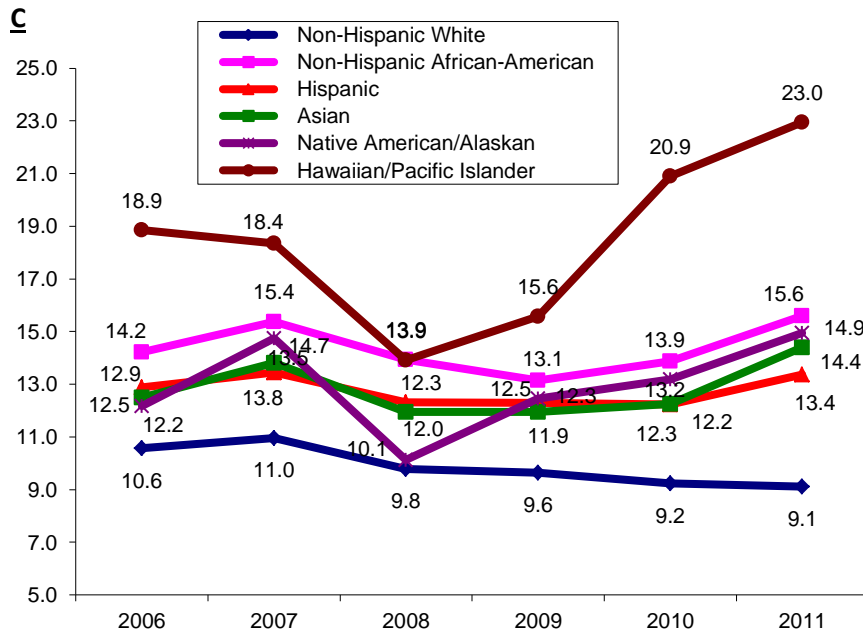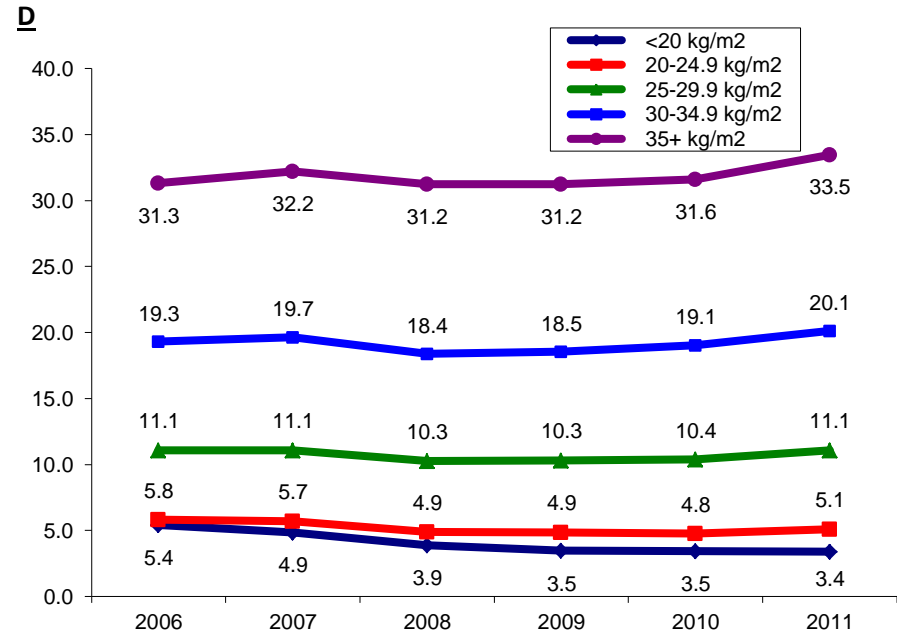

**Web Table 1.** Select Characteristics of US Adults With and Without Incident Diabetes, by Year: SUPREME-DM Project, 2006–2011

|                                           | 2006         | 2007         | 2008         | 2009         | 2010         | 2011         |
|-------------------------------------------|--------------|--------------|--------------|--------------|--------------|--------------|
| <b>Population</b>                         |              |              |              |              |              |              |
| Incident Diabetes                         | 47,667       | 50,605       | 46,544       | 46,848       | 47,137       | 50,249       |
| No Diabetes                               | 4,481,239    | 4,511,293    | 4,580,461    | 4,651,952    | 4,685,802    | 4,733,314    |
| Total                                     | 4,528,906    | 4,561,898    | 4,627,005    | 4,698,800    | 4,732,939    | 4,783,563    |
| <b>% Change from Previous Year</b>        |              |              |              |              |              |              |
| Incident Diabetes                         | --           | 6.2%         | -8.0%        | 0.7%         | 0.6%         | 6.6%         |
| No Diabetes                               | --           | 0.7%         | 1.5%         | 1.6%         | 0.7%         | 1.0%         |
| Total                                     | --           | 0.7%         | 1.4%         | 1.6%         | 0.7%         | 1.1%         |
| <b>Years Eligibility Prior to Year</b>    |              |              |              |              |              |              |
| Incident Diabetes                         | 6.5 (2.3)    | 7.2 (2.7)    | 7.7 (3.1)    | 8.3 (3.4)    | 8.8 (3.7)    | 9.4 (4.1)    |
| No Diabetes                               | 6.2 (2.5)    | 6.8 (2.8)    | 7.3 (3.2)    | 7.7 (3.6)    | 8.2 (3.9)    | 8.7 (4.3)    |
| <b>Age</b>                                |              |              |              |              |              |              |
| Incident Diabetes                         | 59.1 (14.0)  | 59.1 (13.8)  | 58.5 (13.7)  | 58.4 (13.5)  | 58.4 (13.5)  | 58.4 (13.6)  |
| No Diabetes                               | 49.0 (16.5)  | 49.1 (16.5)  | 49.1 (16.5)  | 49.1 (16.6)  | 49.1 (16.7)  | 49.1 (16.9)  |
| <b>% Women</b>                            |              |              |              |              |              |              |
| Incident Diabetes                         | 48.5%        | 48.3%        | 47.6%        | 47.3%        | 48.2%        | 49.0%        |
| No Diabetes                               | 54.1%        | 54.0%        | 54.0%        | 54.2%        | 54.3%        | 54.4%        |
| <b>% Non-White</b>                        |              |              |              |              |              |              |
| Incident Diabetes                         | 45.8%        | 47.3%        | 48.1%        | 48.9%        | 51.1%        | 54.6%        |
| No Diabetes                               | 40.3%        | 41.0%        | 41.7%        | 42.4%        | 42.9%        | 43.2%        |
| <b>Body Mass Index (kg/m<sup>2</sup>)</b> |              |              |              |              |              |              |
| Incident Diabetes                         | 32.5 (8.0)   | 32.5 (7.9)   | 32.7 (7.8)   | 32.7 (7.7)   | 32.8 (7.9)   | 32.6 (7.8)   |
| No Diabetes                               | 28.4 (6.7)   | 28.2 (6.6)   | 28.2 (6.5)   | 28.2 (6.6)   | 28.2 (6.6)   | 28.1 (6.5)   |
| <b>Fasting Plasma Glucose (mg/dl)</b>     |              |              |              |              |              |              |
| Incident Diabetes                         | 159.4 (65.5) | 156.9 (63.0) | 159.2 (64.2) | 158.5 (64.2) | 154.5 (62.6) | 151.3 (60.9) |
| No Diabetes                               | 96.1 (11.7)  | 96.5 (11.5)  | 96.1 (11.4)  | 96.3 (11.5)  | 95.7 (11.2)  | 96.1 (11.0)  |
| <b>Hemoglobin A<sub>1c</sub> (%)</b>      |              |              |              |              |              |              |
| Incident Diabetes                         | 7.6 (2.1)    | 7.7 (2.1)    | 7.7 (2.1)    | 7.7 (2.1)    | 7.7 (2.0)    | 7.6 (2.0)    |
| No Diabetes                               | 5.6 (0.4)    | 5.7 (0.4)    | 5.7 (0.4)    | 5.7 (0.5)    | 5.7 (0.4)    | 5.8 (0.4)    |

Data are numbers of individuals in the population rows, and means (standard deviations) or percent in the remainder of the table.

**Web Table 2.** Proportions of US Adults Diagnosed With Incident Diabetes by Means of A1C and Fasting Plasma Glucose Testing Prior to or at Diagnosis, by Age, Sex, Race/Ethnicity, and Body Mass Index: SUPREME-DM Project, 2006–2011

|                  |                          | 2006  | 2007  | 2008  | 2009  | 2010  | 2011  |
|------------------|--------------------------|-------|-------|-------|-------|-------|-------|
| <b>Overall</b>   |                          |       |       |       |       |       |       |
|                  | Had Fasting Glucose Only | 18.0% | 18.8% | 18.9% | 18.9% | 13.9% | 10.1% |
|                  | Had A1C Only             | 11.3% | 12.5% | 12.0% | 11.8% | 14.8% | 19.7% |
|                  | Had Both FPG and A1C     | 44.6% | 46.8% | 47.9% | 50.4% | 54.0% | 54.7% |
|                  | Any Glycemia Testing     | 73.9% | 78.1% | 78.8% | 81.1% | 82.7% | 84.5% |
| <b>Sex</b>       |                          |       |       |       |       |       |       |
| Men              | Had Fasting Glucose Only | 18.3% | 19.1% | 19.3% | 19.0% | 14.4% | 10.6% |
|                  | Had A1C Only             | 12.1% | 12.7% | 12.2% | 12.1% | 14.8% | 19.7% |
|                  | Had Both FPG and A1C     | 43.7% | 46.4% | 47.0% | 50.0% | 52.9% | 53.7% |
|                  | Any Glycemia Testing     | 74.1% | 78.2% | 78.5% | 81.1% | 82.1% | 84.0% |
| Women            | Had Fasting Glucose Only | 17.7% | 18.5% | 18.6% | 18.8% | 13.4% | 15.1% |
|                  | Had A1C Only             | 10.6% | 12.3% | 11.7% | 11.5% | 14.7% | 19.6% |
|                  | Had Both FPG and A1C     | 45.6% | 47.1% | 48.9% | 50.9% | 55.2% | 55.7% |
|                  | Any Glycemia Testing     | 73.9% | 77.9% | 79.2% | 81.2% | 83.3% | 90.4% |
| <b>Age Group</b> |                          |       |       |       |       |       |       |
| 20-34 Years      | Had Fasting Glucose Only | 13.5% | 14.7% | 14.5% | 14.0% | 10.2% | 7.8%  |
|                  | Had A1C Only             | 14.1% | 15.8% | 13.3% | 15.3% | 19.8% | 22.8% |
|                  | Had Both FPG and A1C     | 44.8% | 44.6% | 48.5% | 50.2% | 50.4% | 51.4% |
|                  | Any Glycemia Testing     | 72.4% | 75.1% | 76.3% | 79.5% | 80.4% | 82.0% |
| 35-44 Years      | Had Fasting Glucose Only | 15.1% | 15.9% | 15.8% | 15.9% | 12.1% | 8.5%  |
|                  | Had A1C Only             | 14.0% | 15.1% | 14.5% | 13.3% | 16.5% | 21.8% |
|                  | Had Both FPG and A1C     | 47.5% | 49.7% | 51.7% | 53.7% | 56.1% | 55.6% |
|                  | Any Glycemia Testing     | 76.6% | 80.7% | 82.0% | 82.9% | 84.7% | 85.9% |
| 45-54 Years      | Had Fasting Glucose Only | 16.9% | 17.8% | 18.3% | 17.6% | 13.2% | 9.1%  |
|                  | Had A1C Only             | 12.3% | 13.1% | 12.8% | 12.5% | 15.7% | 20.2% |
|                  | Had Both FPG and A1C     | 47.8% | 50.0% | 50.8% | 53.7% | 56.1% | 57.8% |
|                  | Any Glycemia Testing     | 77.0% | 80.9% | 81.9% | 83.8% | 85.0% | 87.1% |

|                           |                          |       |       |       |       |       |       |
|---------------------------|--------------------------|-------|-------|-------|-------|-------|-------|
| 55-64 Years               | Had Fasting Glucose Only | 19.0% | 19.8% | 20.0% | 19.5% | 14.1% | 9.8%  |
|                           | Had A1C Only             | 9.8%  | 11.7% | 11.1% | 11.2% | 13.8% | 19.2% |
|                           | Had Both FPG and A1C     | 47.6% | 49.5% | 50.2% | 52.5% | 56.6% | 56.7% |
|                           | Any Glycemia Testing     | 76.4% | 81.0% | 81.3% | 83.2% | 84.5% | 85.7% |
| 65-74 Years               | Had Fasting Glucose Only | 20.8% | 21.6% | 21.0% | 21.3% | 15.6% | 12.0% |
|                           | Had A1C Only             | 10.0% | 10.9% | 10.6% | 10.2% | 13.2% | 17.8% |
|                           | Had Both FPG and A1C     | 44.3% | 46.3% | 47.5% | 50.1% | 54.8% | 55.7% |
|                           | Any Glycemia Testing     | 75.1% | 78.8% | 79.1% | 81.6% | 83.6% | 85.5% |
| 75-84 Years               | Had Fasting Glucose Only | 19.4% | 19.5% | 20.1% | 21.6% | 15.7% | 12.3% |
|                           | Had A1C Only             | 11.3% | 11.9% | 11.6% | 11.8% | 14.4% | 19.2% |
|                           | Had Both FPG and A1C     | 35.3% | 38.3% | 38.2% | 39.6% | 45.6% | 46.9% |
|                           | Any Glycemia Testing     | 66.0% | 69.7% | 69.9% | 73.0% | 75.7% | 78.4% |
| ≥85 Years                 | Had Fasting Glucose Only | 12.9% | 15.4% | 15.6% | 17.6% | 13.4% | 10.6% |
|                           | Had A1C Only             | 12.7% | 13.1% | 12.9% | 12.5% | 15.3% | 22.1% |
|                           | Had Both FPG and A1C     | 24.1% | 25.7% | 25.7% | 28.7% | 32.1% | 31.0% |
|                           | Any Glycemia Testing     | 49.7% | 54.2% | 54.2% | 58.8% | 60.8% | 63.7% |
| <b>Body Mass Index</b>    |                          |       |       |       |       |       |       |
| <20 kg/m <sup>2</sup>     | Had Fasting Glucose Only | 14.2% | 17.5% | 18.2% | 15.4% | 14.4% | 9.9%  |
|                           | Had A1C Only             | 11.1% | 10.0% | 7.9%  | 10.3% | 14.6% | 22.3% |
|                           | Had Both FPG and A1C     | 27.8% | 28.1% | 24.1% | 31.2% | 34.3% | 35.5% |
|                           | Any Glycemia Testing     | 53.1% | 55.6% | 50.2% | 56.9% | 63.3% | 67.7% |
| 20-24.9 kg/m <sup>2</sup> | Had Fasting Glucose Only | 18.4% | 18.2% | 18.6% | 19.4% | 13.6% | 10.5% |
|                           | Had A1C Only             | 10.4% | 11.0% | 10.2% | 10.3% | 13.1% | 17.3% |
|                           | Had Both FPG and A1C     | 41.7% | 43.3% | 43.4% | 45.3% | 51.8% | 51.8% |
|                           | Any Glycemia Testing     | 70.5% | 72.5% | 72.2% | 75.0% | 78.5% | 79.6% |
| 25-29.9 kg/m <sup>2</sup> | Had Fasting Glucose Only | 18.9% | 19.4% | 20.4% | 20.3% | 15.1% | 10.9% |
|                           | Had A1C Only             | 12.2% | 11.2% | 11.1% | 10.8% | 13.4% | 17.7% |
|                           | Had Both FPG and A1C     | 47.0% | 50.5% | 50.0% | 52.5% | 57.2% | 58.4% |
|                           | Any Glycemia Testing     | 78.1% | 81.1% | 81.5% | 83.6% | 85.7% | 87.0% |

|                               |                          |       |       |       |       |       |       |
|-------------------------------|--------------------------|-------|-------|-------|-------|-------|-------|
| 30-34.9 kg/m <sup>2</sup>     | Had Fasting Glucose Only | 19.7% | 19.5% | 19.8% | 20.3% | 15.3% | 11.0% |
|                               | Had A1C Only             | 13.7% | 11.6% | 11.0% | 11.0% | 14.2% | 19.0% |
|                               | Had Both FPG and A1C     | 49.8% | 53.0% | 53.2% | 54.9% | 57.5% | 59.2% |
|                               | Any Glycemia Testing     | 83.2% | 84.1% | 84.0% | 86.2% | 87.0% | 89.2% |
| ≥35 kg/m <sup>2</sup>         | Had Fasting Glucose Only | 17.2% | 18.7% | 18.7% | 19.0% | 13.4% | 9.5%  |
|                               | Had A1C Only             | 14.1% | 12.8% | 12.6% | 12.1% | 15.9% | 22.0% |
|                               | Had Both FPG and A1C     | 50.6% | 52.9% | 53.6% | 55.6% | 58.2% | 57.0% |
|                               | Any Glycemia Testing     | 81.9% | 84.4% | 84.9% | 86.7% | 87.5% | 88.5% |
| <b>Race/Ethnicity</b>         |                          |       |       |       |       |       |       |
| Non-Hispanic White            | Had Fasting Glucose Only | 18.8% | 20.5% | 20.4% | 21.0% | 16.0% | 11.8% |
|                               | Had A1C Only             | 11.7% | 12.1% | 11.8% | 11.8% | 14.7% | 19.5% |
|                               | Had Both FPG and A1C     | 43.4% | 44.6% | 45.7% | 47.2% | 50.6% | 51.2% |
|                               | Any Glycemia Testing     | 73.9% | 77.2% | 77.9% | 80.0% | 81.3% | 82.5% |
| Non-Hispanic Black            | Had Fasting Glucose Only | 16.3% | 16.2% | 16.2% | 15.2% | 10.7% | 7.8%  |
|                               | Had A1C Only             | 10.8% | 18.0% | 17.2% | 17.0% | 21.3% | 25.4% |
|                               | Had Both FPG and A1C     | 37.1% | 40.5% | 41.9% | 46.5% | 48.9% | 48.7% |
|                               | Any Glycemia Testing     | 64.2% | 74.7% | 75.3% | 78.7% | 80.9% | 81.9% |
| Hispanic                      | Had Fasting Glucose Only | 20.3% | 19.5% | 19.3% | 19.8% | 15.0% | 10.7% |
|                               | Had A1C Only             | 12.7% | 11.9% | 11.6% | 10.7% | 12.8% | 16.7% |
|                               | Had Both FPG and A1C     | 47.1% | 50.4% | 52.4% | 55.1% | 59.5% | 61.5% |
|                               | Any Glycemia Testing     | 80.1% | 81.8% | 83.3% | 85.6% | 87.3% | 88.9% |
| Asian                         | Had Fasting Glucose Only | 16.7% | 18.2% | 18.2% | 17.3% | 11.1% | 8.0%  |
|                               | Had A1C Only             | 7.4%  | 8.4%  | 8.2%  | 8.6%  | 11.7% | 18.2% |
|                               | Had Both FPG and A1C     | 59.9% | 60.4% | 59.9% | 62.7% | 66.9% | 65.6% |
|                               | Any Glycemia Testing     | 84.0% | 87.0% | 86.3% | 88.6% | 89.7% | 91.8% |
| Native American/Alaska Native | Had Fasting Glucose Only | 22.4% | 17.6% | 23.0% | 21.7% | 14.7% | 12.0% |
|                               | Had A1C Only             | 10.3% | 13.4% | 10.0% | 14.7% | 14.7% | 22.8% |
|                               | Had Both FPG and A1C     | 41.4% | 46.5% | 52.0% | 46.5% | 58.0% | 53.9% |
|                               | Any Glycemia Testing     | 74.1% | 77.5% | 85.0% | 82.9% | 87.4% | 88.7% |

|                              |                          |       |       |       |       |       |       |
|------------------------------|--------------------------|-------|-------|-------|-------|-------|-------|
| Hawaiian/Pacific<br>Islander | Had Fasting Glucose Only | 16.9% | 13.9% | 13.3% | 12.1% | 9.8%  | 4.4%  |
|                              | Had A1C Only             | 9.7%  | 6.9%  | 9.4%  | 11.8% | 29.1% | 41.6% |
|                              | Had Both FPG and A1C     | 58.2% | 59.4% | 63.3% | 65.6% | 48.2% | 46.2% |
|                              | Any Glycemia Testing     | 84.8% | 80.2% | 86.0% | 89.5% | 87.1% | 92.2% |

---

## Web Appendix

### Surveillance, Prevention, and Management of Diabetes Mellitus (SUPREME-DM) Project Personnel

Kaiser Permanente Colorado Institute for Health Research: John F. Steiner, MD, MPH; Andrea R. Paolino, MA; Marsha Raebel, PharmD; Stan Xu, PhD; Emily Schroeder, MD, PhD; William (Troy) Donahoo, MD, FTOS; Michael Shainline, MS, MBA; Christina Clarke, BS; Glenn Goodrich, MS; Jennifer L. Ellis, MBA, MSPH; J. David Powers, MS (B).

Group Health Research Institute: Katherine M. Newton, PhD; Leo S. Morales, MD, PhD, FACP; Do Peterson, MS; Gabrielle Gundersen, BA; Luesa Jordan; Bill Tolbert, MA.

Geisinger Health System: H. Lester Kirchner, PhD; Ronald Harris, MD; Annemarie Hirsch; Rebecca (Becky) Stametz, MPH; Pinky Barua, MS, MBA; Diane Littlewood; Keith Needham.

Henry Ford Health System: Abraham Thomas, MD, MPH; Jennifer Elston Lafata, PhD; Renee Atkinson, MBA; Nonna Akkerman, BCS; Aida Li, MCS.

HealthPartners: Patrick O'Connor, MD, MA, MPH; Jay Desai, PhD, MPH; Nancy Sherwood, PhD; Gabriela Vazquez Benitez, PhD, MSc; Kris Ohnsorg, RN, MPH; Emily D. Parker, PhD, MPH; Mary Becker, BA.

Kaiser Permanente Hawaii: Beth Waitzfelder, PhD; Rebecca Williams, DrPH, MPH; John Parker, BS.

Kaiser Permanente Northern California: Julie Schmittiel, PhD; Andrew J. Karter, PhD; Romain Neugebauer, PhD; Assiamira Ferrara, MD, PhD; Deanne Wiley, BA; Wendy Dyer, MS; Zheng Zhu.

Kaiser Permanente Northwest: Gregory A. Nichols, PhD; Brian Hazlehurst, PhD; Erin LeBlanc, MD, MPH; Daniel S. Sapp; Stephen Kurtz; Teresa M. Kimes, MS; Chuhe Chen, PhD.

Kaiser Permanente Southern California: Jean M. Lawrence, ScD, MPH, MSSA; Melissa Preciado, MPH; Harp Takhar, MPH; Jian Zhang, MS; Joanie Chung, MPH.



Kaiser Permanente Georgia: Melissa Butler, PharmD, MPH, PhD, BCPS; Dzifa Adjaye-Gbewonyo, MPH, CPH; Anping Chang, MS, MPH; Junling Ren, MEd.

Marshfield Clinic: Ram D. Pathak, MD, FACP; Amit Acharya, BDS, MS, PhD; Valerie McManus, MPH; Jay Fuehrer, BBA.

Johns Hopkins University: Jodi Segal, MD, MPH.

University of Michigan: Michele Heisler, MD, MPA.
